TITLE: WEDGE PRESSURE AS A PREDICTOR OF ISCHEMIA DURING CABG

AUTHORS: R.W. Lieberman, M.D., A.J. Schwartz, M.D., D.R. Jobes, M.D., A.J. Ominsky, M.D.,  
R.W. Andrews, B.A.

AFFILIATION: Department of Anesthesia, University of Pennsylvania School of Medicine,  
Philadelphia, Pennsylvania 19104

**Introduction:** Since there are no universally-accepted indications for pulmonary artery (PA) catheterization during coronary artery surgery, the anesthesiologist's decision to use a PA catheter depends upon educated guesses concerning the probable usefulness of the information gained, and the risk of catheter-related morbidity. Other investigators have addressed the issue of PA catheter-related morbidity, and have found that myocardial ischemia may be a frequent complication of catheter insertion.<sup>1</sup> We asked whether the extra information gained--the "wedge" (W) or PA-occluded pressure--enhanced the ability to anticipate ischemic injury: 1. When elevated W is associated with normal heart rate (HR), systolic blood pressure (BP<sub>s</sub>), central venous pressure (CVP), and electrocardiogram (EKG), and the W is not treated, how often will EKG evidence of ischemia supervene? 2. How often does EKG evidence of ischemia occur with a normal W?

**Materials and Methods:** We monitored nineteen coronary artery patients with a V-5 surface EKG, a radial artery catheter, and a triple-lumen PA catheter. The EKG, BP<sub>s</sub>, CVP, and PA pressure were recorded continuously, from anesthetic induction until five minutes after sternotomy, and for ten minutes following cardiopulmonary bypass (CPB); W was recorded once each minute during these periods.

We defined ischemia as ST-segment deflections of at least one millimeter. We accepted this electrocardiographic definition of ischemia because:

1. The EKG is the only universally available clinical tool for detecting intra-operative ischemia
  2. We could find no universally-accepted single-lead ST-segment criterion for ischemia in anesthetized (or awake) man, although most investigators have accepted one or two millimeter deflections as the ischemic threshold
  3. Using less rigid ST-segment criteria (2 mm) may increase the incidence of "false-negative" ischemic episodes more than it would decrease the incidence of "false-positive" episodes<sup>2</sup>
  4. Controlled studies of pacing<sup>3</sup> and exercise<sup>4</sup> induced angina show that abnormalities of myocardial lactate metabolism, LVEDP, and ST-segments occur "at about the same time", and that the magnitude of ST-segment depression related to the degree of LVEDP elevation.
- We considered a W abnormal if greater than 15 torr, BP<sub>s</sub> abnormal if greater than 20% above the patient's average awake value, HR abnormal if > 100, or if more than 50% above average awake value, and CVP abnormal if greater than 15 torr, or if it increased 4 torr above the pre-induction value to at least 11 torr.

Anesthesia consisted of morphine-scopolamine pre-medication, followed by nitrous oxide-halothane, with pancuronium for muscle relaxation. Ventilation was mechanically controlled. We did not intervene pharmacologically when an elevated W was the

only abnormality. We did intervene--with intravenous vasodilators or increased halothane delivery--whenever the BP or EKG became abnormal.

#### Findings:

1. The table describes the number of times that a single hemodynamic abnormality preceded EKG evidence of ischemia by two minutes:

| Hemodynamic Abnormality | Number of Occurrences | Subsequent Ischemic Episodes | Abnormality was only warning of Ischemic Episodes |
|-------------------------|-----------------------|------------------------------|---------------------------------------------------|
| Systolic BP             | 77 (10 patients)      | 3 (2 patients)               | 2 (2 patients)                                    |
| CVP                     | 38 (10 patients)      | 5 (4 patients)               | 2 (2 patients)                                    |
| HR                      | 13 (3 patients)       | 3 (2 patients)               | NONE                                              |
| Wedge                   | 73 (16 patients)      | 2 (2 patients)               | 2 (2 patients)                                    |

2. An elevated W was never the only warning of impending ischemia in our patients with normal preoperative left ventricular function.

3. An elevated W was the only abnormality preceding myocardial ischemia on one occasion in each of two patients with impaired pre-operative left ventricular function.

4. We observed a total of 150 minutes of ischemia among 14 of our patients. The W was normal during 89 of these minutes (in 10 patients).

#### Conclusions:

1. EKG evidence of ischemia occurs frequently in the presence of a normal W. This suggests that the W may not be the most sensitive clinical index of myocardial ischemia.

2. Ischemia was not predictable by monitoring W in our patients with normal pre-op left ventricular (LV) function.

3. An abnormal W did precede ischemia in some patients with impaired pre-op LV function. Knowing the W may be valuable in predicting ischemia in some patients with abnormal pre-op LV function.

#### References:

1. Lunn JK, Stanley TH: Arterial blood pressure and pulse rate responses to pulmonary artery catheterization prior to cardiac and major vascular surgery. Abstracts of Scientific Papers, 1978 ASA Annual Meeting. p. 577.
2. Froelicher VF, Thompson AJ, Lange MR, et al: Value of exercise testing for screening asymptomatic men for latent coronary artery disease. Prog. Cardiovasc. Dis. 18: 265, 1976.
3. Parker JO, Chiang MA, West RO, et al: Sequential alterations in myocardial lactate metabolism; ST-segment and left ventricular function during angina induced by atrial pacing. Circ, 40: 113, 1969.
4. Parker JO, West RO, Case, RB, et al: Temporal relationships of myocardial lactate metabolism, left ventricular function, and ST-segment depression during angina precipitated by exercise. Circ 40: 97, 1969.
